# Supplementary material for: Beyond executive functions, creativity skills benefit academic outcomes: Insights from Montessori education
Source: PubMed Central journal article supplement (PMC6874078; doi:10.1371/journal.pone.0225319), 2019-11-21
Supplement: pone.0225319.s002.pdf [file pone.0225319.s002.pdf]

| <b>Control variable</b> | <b>t</b> | <b>df</b> | <b>p</b> | <b>Cohen's d</b> |
|-------------------------|----------|-----------|----------|------------------|
| Age                     | -0.59    | 199       | 0.56     | -0.08            |
| FI                      | 1.09     | 199       | 0.28     | 0.15             |
| SES                     | 0.92     | 156       | 0.36     | 0.15             |
