# Supplementary material for: Beyond executive functions, creativity skills benefit academic outcomes: Insights from Montessori education
Source: PubMed Central journal article supplement (PMC6874078; doi:10.1371/journal.pone.0225319), 2019-11-21
Supplement: pone.0225319.s003.pdf [file pone.0225319.s003.pdf]

**Models Info**

 Mediators  
Models

|    |                                 |
|----|---------------------------------|
| m1 | Creativity skills ~ Pedagogy    |
| m2 | Well-being at school ~ Pedagogy |
| m3 | Executive functions ~ Pedagogy  |

## Full Model

|    |                                                                                               |
|----|-----------------------------------------------------------------------------------------------|
| m4 | Academic outcomes ~ Creativity skills + Well-being at school + Executive functions + Pedagogy |
|----|-----------------------------------------------------------------------------------------------|

 Indirect  
Effects

|      |                                                     |
|------|-----------------------------------------------------|
| IE 1 | Pedagogy ⇒ Creativity skills ⇒ Academic outcomes    |
| IE 2 | Pedagogy ⇒ Well-being at school ⇒ Academic outcomes |
| IE 3 | Pedagogy ⇒ Executive functions ⇒ Academic outcomes  |

**Indirect and Total Effects**

| Type      | Effect                                                   | Estimate      | SE             | 95% C.I. (a)   |               | $\beta$       | z           | p               |
|-----------|----------------------------------------------------------|---------------|----------------|----------------|---------------|---------------|-------------|-----------------|
|           |                                                          |               |                | Lower          | Upper         |               |             |                 |
| Indirect  | <b>Pedagogy1 ⇒ Creativity skills ⇒ Academic outcomes</b> | <b>0.0304</b> | <b>0.01465</b> | <b>0.00257</b> | <b>0.0562</b> | <b>0.0684</b> | <b>2.07</b> | <b>0.038</b>    |
|           | Pedagogy1 ⇒ Well-being at school ⇒ Academic outcomes     | 0.0141        | 0.00793        | 0.00126        | 0.0324        | 0.0317        | 1.78        | 0.076           |
|           | Pedagogy1 ⇒ Executive functions ⇒ Academic outcomes      | 0.0115        | 0.00970        | 0.00644        | 0.0324        | 0.0258        | 1.18        | 0.238           |
| Component | <b>Pedagogy1 ⇒ Creativity skills</b>                     | <b>0.1796</b> | <b>0.02208</b> | <b>0.13393</b> | <b>0.2228</b> | <b>0.4870</b> | <b>8.13</b> | <b>&lt;.001</b> |
|           | <b>Creativity skills ⇒ Academic outcomes</b>             | <b>0.1691</b> | <b>0.08028</b> | <b>0.01448</b> | <b>0.3086</b> | <b>0.1405</b> | <b>2.11</b> | <b>0.035</b>    |
|           | <b>Pedagogy1 ⇒ Well-being at school</b>                  | <b>0.0630</b> | <b>0.02812</b> | <b>0.00627</b> | <b>0.1187</b> | <b>0.1585</b> | <b>2.24</b> | <b>0.025</b>    |
|           | <b>Well-being at school ⇒ Academic outcomes</b>          | <b>0.2235</b> | <b>0.06837</b> | <b>0.08783</b> | <b>0.3556</b> | <b>0.1999</b> | <b>3.27</b> | <b>0.001</b>    |
|           | Pedagogy1 ⇒ Executive functions                          | 0.0385        | 0.02980        | 0.02243        | 0.0934        | 0.0949        | 1.29        | 0.196           |
|           | <b>Executive functions ⇒ Academic outcomes</b>           | <b>0.2974</b> | <b>0.06360</b> | <b>0.17958</b> | <b>0.4324</b> | <b>0.2719</b> | <b>4.68</b> | <b>&lt;.001</b> |
| Direct    | <b>Pedagogy1 ⇒ Academic outcomes</b>                     | <b>0.1167</b> | <b>0.02993</b> | <b>0.06126</b> | <b>0.1801</b> | <b>0.2629</b> | <b>3.90</b> | <b>&lt;.001</b> |
| Total     | Pedagogy1 ⇒ Academic outcomes                            | 0.1726        | 0.02905        | 0.11563        | 0.2295        | 0.3873        | 5.94        | <.001           |

Note. (a) Confidence intervals computed with method: Bootstrap percentiles Pedagogy 1 stands for M-T.
