# Supplementary material for: Beyond executive functions, creativity skills benefit academic outcomes: Insights from Montessori education
Source: PubMed Central journal article supplement (PMC6874078; doi:10.1371/journal.pone.0225319), 2019-11-21

A5

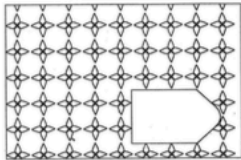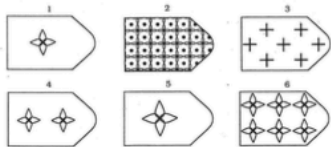

A6

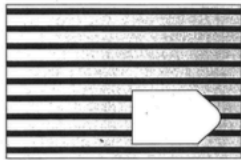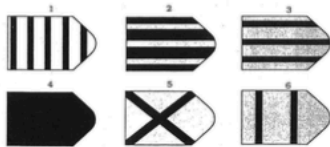

A7

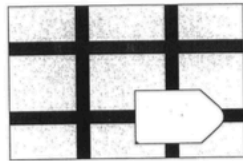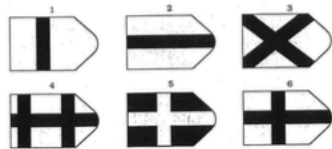

Supplement: pone.0225319.s005.pdf [file pone.0225319.s005.pdf]
