# Supplementary material for: Beyond executive functions, creativity skills benefit academic outcomes: Insights from Montessori education
Source: PubMed Central journal article supplement (PMC6874078; doi:10.1371/journal.pone.0225319), 2019-11-21
Supplement: pone.0225319.s006.pdf [file pone.0225319.s006.pdf]

| E.CO.S.SE                                             | Examples of sentence for oral comprehension (CO)                                                 | Pictures                                                                             |
|-------------------------------------------------------|--------------------------------------------------------------------------------------------------|--------------------------------------------------------------------------------------|
| <b>Active sentences</b>                               | <b>OC</b> - La fille pousse le cheval.<br><i>The girl pushes the horse</i>                       | 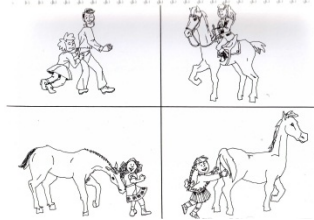    |
| <b>Passive sentences</b>                              | <b>OC</b> - La fille est poursuivie par le cheval.<br><i>The girls is pursued by the horse</i>   |    |
| <b>Pronouns</b>                                       | <b>OC</b> - L'éléphant les porte.<br><i>The elephant carries them</i>                            |    |
| <b>Double negation</b>                                | <b>CO</b> - Ni le garçon ni le cheval ne courent.<br><i>Neither the boy nor the horse run</i>    |    |
| <b>Spatial relation</b>                               | <b>CO</b> - Le crayon est derrière la boîte.<br><i>The pencil is behind the box</i>              |  |
| <b>Embedded relative clause with spatial relation</b> | <b>CO</b> - Le crayon qui est sur le livre est jaune.<br><i>The pencil on the book is yellow</i> |  |
