# Supplementary material for: Beyond executive functions, creativity skills benefit academic outcomes: Insights from Montessori education
Source: PubMed Central journal article supplement (PMC6874078; doi:10.1371/journal.pone.0225319), 2019-11-21
Supplement: pone.0225319.s007.pdf [file pone.0225319.s007.pdf]

| Oral Sentence                                                                                                                                                                                                                                                                                             | Expected Answer                                                  |
|-----------------------------------------------------------------------------------------------------------------------------------------------------------------------------------------------------------------------------------------------------------------------------------------------------------|------------------------------------------------------------------|
| <p><i>“Jean a 4 cerises. Il en mange 1. Combien de cerises lui reste-t-il ?”</i></p> <p><i>Jean has 4 cherries. He eats one. How many cherries are left?</i></p>                                                                                                                                          | <p><math>4 - 1 = \mathbf{3}</math></p>                           |
| <p><i>“Pierre a 12 billes. Il donne 5 billes à sa copine Anne. Combien de billes a Pierre maintenant ?”</i></p> <p><i>Pierre has 12 marbles. He gives 5 marbles to his girlfriend Anne. How many marbles has Peter now?</i></p>                                                                           | <p><math>12 - 5 = \mathbf{7}</math></p>                          |
| <p><i>“Il y a 4 poissons dans le bocal. David ajoute des poissons. Maintenant, il y a 6 poissons dans le bocal. Combien David a-t-il ajouté de poissons ?”</i></p> <p><i>There are four fishes in the jar. David adds fishes. Now there are six fishes in the jar. How many fishes did David add?</i></p> | <p><math>4 + x = 6</math></p> <p><math>x = \mathbf{2}</math></p> |
